## Correction

**Correction: Systematic review and meta-analysis of the prognostic significance of microRNAs in cervical cancer****Zhilan Chen<sup>1,\*</sup>, Yingyan Han<sup>2,\*</sup>, Chengwen Song<sup>1</sup>, Huafang Wei<sup>1</sup>, Ying Chen<sup>1</sup>, Kecheng Huang<sup>2</sup>, Shuang Li<sup>2</sup>, Ding Ma<sup>2</sup>, Shixuan Wang<sup>2</sup>, Jing Wang<sup>1</sup> and Qiping Lu<sup>3</sup>**<sup>1</sup>Department of Obstetrics and Gynecology, Wuhan General Hospital of People's Liberation Army of China, Wuhan, Hubei, China<sup>2</sup>Department of Obstetrics and Gynecology, Tongji Hospital, Tongji Medical College, Huazhong University of Science and Technology, Wuhan, Hubei, China<sup>3</sup>Department of General Surgery, Wuhan General Hospital of People's Liberation Army of China, Wuhan, Hubei, China

\*These authors contributed equally to this work

**Published:****Copyright:** © 2023 Chen et al. This is an open access article distributed under the terms of the [Creative Commons Attribution License](#) (CC BY 3.0), which permits unrestricted use, distribution, and reproduction in any medium, provided the original author and source are credited.**This article has been corrected:** Kecheng Huang has now been listed as a corresponding author on this paper:

Kecheng Huang: 365000619@qq.com

Original article: Oncotarget. 2018; 9:17141–17148. <https://doi.org/10.18632/oncotarget.23839>
